# Supplementary material for: Larval Fish Assemblages in Coastal Waters of Bangladesh: Spatial and Seasonal Dynamics
Source: MDPI journal article supplement (doi:10.3390/conservation4010003), 2024-01-11
Supplement: s1 [file s1]

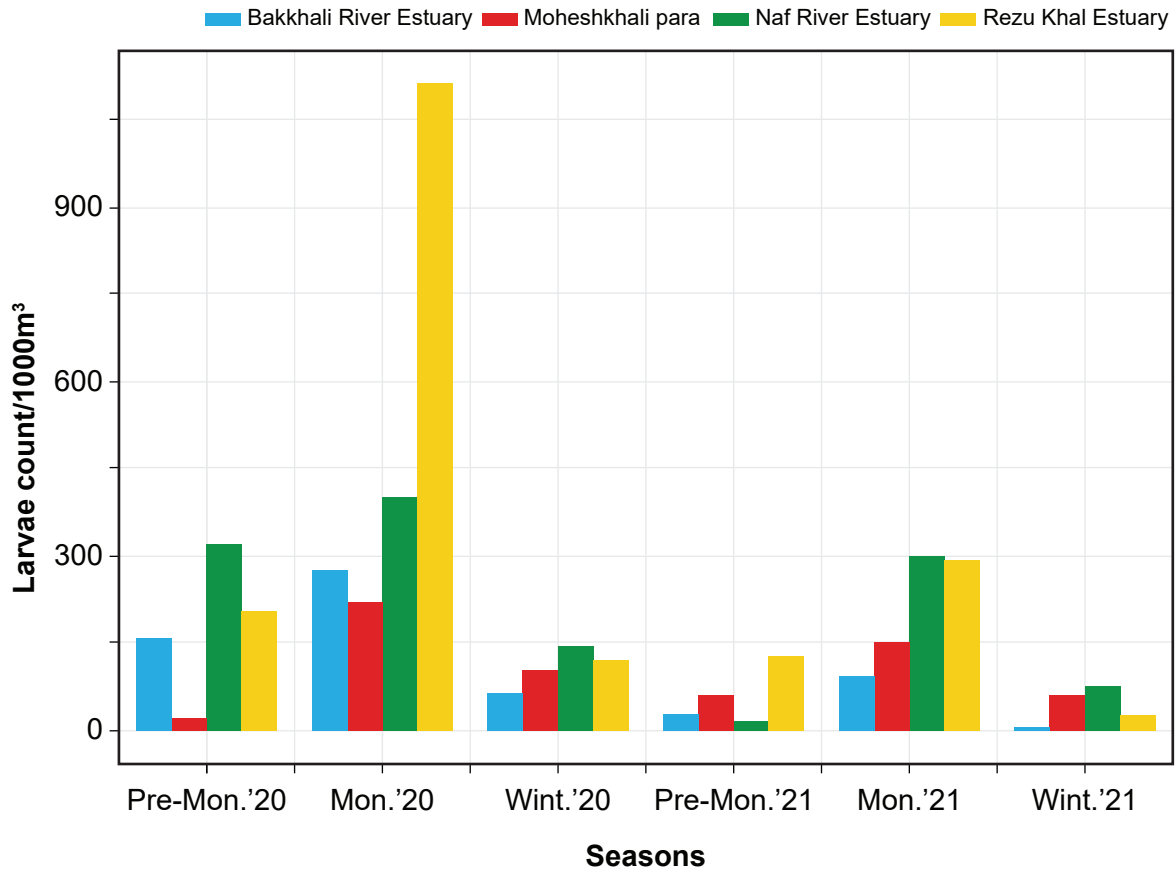

Supplementary Figure 1. A comparative analysis of the fish larvae abundance across seasons (Pre-mon.: Pre-monsoon, Mon.: Monsoon, and Wint.: Winter) in four sites (Bakkhali River Estuary, Moheshkhalipara, Naf River Estuary, and Rezukhal Estuary)
